# Supplementary material for: Xylazine in Overdose Deaths and Forensic Drug Reports in US States, 2019-2022
Source: PubMed Central journal article supplement (PMC10770774; doi:10.1001/jamanetworkopen.2023.50630), 2024-01-05
Supplement: jamanetwopen-e2350630-s002.pdf [file jamanetwopen-e2350630-s002.pdf]

## Data Sharing Statement

Cano. Xylazine in Overdose Deaths and Forensic Drug Reports in US States, 2019-2022.  
*JAMA Netw Open*. Published January 05, 2024. doi:10.1001/jamanetworkopen.2023.50630

### Data

**Data available:** No

### Additional Information

**Explanation for why data not available:** All data used in the study are publicly-accessible online from the sources cited in the manuscript.
